# Supplementary material for: Antimetastatic Effect of Halichondramide, a Trisoxazole Macrolide from the Marine Sponge Chondrosia corticata, on Human Prostate Cancer Cells via Modulation of Epithelial-to-Mesenchymal Transition
Source: MDPI journal article supplement (doi:10.3390/md11072472), 2013-07-15
Supplement: s1 [file s1]

marinedrugs-11-02472-s001.mol
  corina  04141405573D 1   1.00000     0.00000 
CORINA 3.49 0023  12.04.2013
 60 63  0  0  0  0  0  0  0  0999 V2000
    7.6050  -15.0901    3.2268 N   0  0  0  0  0  0  0  0  0  0  0  0
    7.2005  -14.0096    2.4476 C   0  0  0  0  0  0  0  0  0  0  0  0
    5.9165  -13.7925    2.2367 C   0  0  0  0  0  0  0  0  0  0  0  0
    5.4786  -12.6230    1.3932 C   0  0  0  0  0  0  0  0  0  0  0  0
    4.5829  -13.1207    0.2570 C   0  0  0  0  0  0  0  0  0  0  0  0
    4.0377  -11.9235   -0.5243 C   0  0  0  0  0  0  0  0  0  0  0  0
    5.1829  -11.1629   -1.1415 C   0  0  0  0  0  0  0  0  0  0  0  0
    5.0503   -9.6852   -1.4062 C   0  0  0  0  0  0  0  0  0  0  0  0
    6.3444   -9.1610   -2.0317 C   0  0  0  0  0  0  0  0  0  0  0  0
    6.2098   -7.6608   -2.3005 C   0  0  0  0  0  0  0  0  0  0  0  0
    7.5443   -7.1121   -2.8093 C   0  0  0  0  0  0  0  0  0  0  0  0
    7.4096   -5.6119   -3.0781 C   0  0  0  0  0  0  0  0  0  0  0  0
    8.7104   -5.0840   -3.6867 C   0  0  0  0  0  0  0  0  0  0  0  0
    8.7556   -5.4354   -5.1756 C   0  0  0  0  0  0  0  0  0  0  0  0
    7.4731   -6.1718   -5.5665 C   0  0  0  0  0  0  0  0  0  0  0  0
    7.7626   -7.1365   -6.7185 C   0  0  0  0  0  0  0  0  0  0  0  0
    8.2327   -8.4557   -6.1650 C   0  0  0  0  0  0  0  0  0  0  0  0
    8.2426   -9.5454   -6.9287 C   0  0  0  0  0  0  0  0  0  0  0  0
    3.1007  -12.4187   -1.6279 C   0  0  0  0  0  0  0  0  0  0  0  0
    6.2068  -11.7374   -1.4239 O   0  0  0  0  0  0  0  0  0  0  0  0
    5.1267   -7.4269   -3.3555 C   0  0  0  0  0  0  0  0  0  0  0  0
    8.7700   -3.6433   -3.5243 O   0  0  0  0  0  0  0  0  0  0  0  0
    8.8774   -4.1515   -5.9988 C   0  0  0  0  0  0  0  0  0  0  0  0
    8.7108  -10.8167   -6.3493 C   0  0  0  0  0  0  0  0  0  0  0  0
    8.7358  -12.0133   -6.9578 O   0  0  0  0  0  0  0  0  0  0  0  0
    9.2252  -12.9152   -6.0833 C   0  0  0  0  0  0  0  0  0  0  0  0
    9.1791  -10.9484   -5.1299 N   0  0  0  0  0  0  0  0  0  0  0  0
    9.5068  -12.2454   -4.9359 C   0  0  0  0  0  0  0  0  0  0  0  0
   10.0663  -12.7946   -3.6833 C   0  0  0  0  0  0  0  0  0  0  0  0
   10.3769  -12.0665   -2.6372 N   0  0  0  0  0  0  0  0  0  0  0  0
   10.3353  -14.0813   -3.4155 O   0  0  0  0  0  0  0  0  0  0  0  0
   10.8650  -12.8849   -1.6768 C   0  0  0  0  0  0  0  0  0  0  0  0
   10.8347  -14.1514   -2.1650 C   0  0  0  0  0  0  0  0  0  0  0  0
   11.3442  -12.4469   -0.3486 C   0  0  0  0  0  0  0  0  0  0  0  0
   11.3848  -11.1991    0.0601 N   0  0  0  0  0  0  0  0  0  0  0  0
   11.8768  -11.1748    1.3093 C   0  0  0  0  0  0  0  0  0  0  0  0
   12.1400  -12.4409    1.6735 C   0  0  0  0  0  0  0  0  0  0  0  0
   11.8046  -13.2348    0.6349 O   0  0  0  0  0  0  0  0  0  0  0  0
    9.1535   -3.1761   -2.3261 C   0  0  0  0  0  0  0  0  0  0  0  0
    9.5183   -4.1309   -1.2188 C   0  0  0  0  0  0  0  0  0  0  0  0
   10.5227   -3.4614   -0.2787 C   0  0  0  0  0  0  0  0  0  0  0  0
   10.3284   -3.9908    1.1432 C   0  0  0  0  0  0  0  0  0  0  0  0
   11.2299   -5.1763    1.3660 C   0  0  0  0  0  0  0  0  0  0  0  0
   10.7079   -6.3986    1.4872 C   0  0  0  0  0  0  0  0  0  0  0  0
   11.5829   -7.5515    1.7053 C   0  0  0  0  0  0  0  0  0  0  0  0
   10.9827   -8.9266    1.8412 C   0  0  0  0  0  0  0  0  0  0  0  0
    9.2068   -1.9844   -2.1344 O   0  0  0  0  0  0  0  0  0  0  0  0
   11.8513   -3.7522   -0.7170 O   0  0  0  0  0  0  0  0  0  0  0  0
   12.0885   -9.9403    2.1469 C   0  0  0  0  0  0  0  0  0  0  0  0
    9.9612   -8.9264    2.9802 C   0  0  0  0  0  0  0  0  0  0  0  0
   12.7846   -7.4005    1.7767 O   0  0  0  0  0  0  0  0  0  0  0  0
    5.3438  -13.9547   -0.6190 O   0  0  0  0  0  0  0  0  0  0  0  0
    4.7808  -15.2526   -0.8205 C   0  0  0  0  0  0  0  0  0  0  0  0
    8.5559   -7.3305   -1.8239 O   0  0  0  0  0  0  0  0  0  0  0  0
    9.7769   -7.8538   -2.3506 C   0  0  0  0  0  0  0  0  0  0  0  0
    6.6048  -15.9859    3.8126 C   0  0  0  0  0  0  0  0  0  0  0  0
    8.9171  -15.3151    3.4376 C   0  0  0  0  0  0  0  0  0  0  0  0
    9.2695  -16.2563    4.1165 O   0  0  0  0  0  0  0  0  0  0  0  0
   12.0455  -10.2901    3.5318 O   0  0  0  0  0  0  0  0  0  0  0  0
   13.3169  -10.6397    4.0826 C   0  0  0  0  0  0  0  0  0  0  0  0
  1  2  1  0      
  2  3  2  0      
  3  4  1  0      
  4  5  1  0      
  5  6  1  0      
  6  7  1  0      
  7  8  1  0      
  8  9  1  0      
  9 10  1  0      
 10 11  1  0      
 11 12  1  0      
 12 13  1  0      
 13 14  1  0      
 14 15  1  0      
 15 16  1  0      
 16 17  1  0      
 17 18  2  0      
  6 19  1  0      
  7 20  2  0      
 10 21  1  0      
 13 22  1  0      
 14 23  1  0      
 18 24  1  0      
 24 25  1  0      
 25 26  1  0      
 24 27  2  0      
 26 28  2  0      
 27 28  1  0      
 28 29  1  0      
 29 30  2  0      
 29 31  1  0      
 30 32  1  0      
 31 33  1  0      
 32 33  2  0      
 32 34  1  0      
 34 35  2  0      
 35 36  1  0      
 36 37  2  0      
 37 38  1  0      
 38 34  1  0      
 22 39  1  0      
 39 40  1  0      
 40 41  1  0      
 41 42  1  0      
 42 43  1  0      
 43 44  2  0      
 44 45  1  0      
 45 46  1  0      
 39 47  2  0      
 41 48  1  0      
 46 49  1  0      
 49 36  1  0      
 46 50  1  0      
 45 51  2  0      
  5 52  1  0      
 52 53  1  0      
 11 54  1  0      
 54 55  1  0      
  1 56  1  0      
  1 57  1  0      
 57 58  2  0      
 49 59  1  0      
 59 60  1  0      
M  STY  1   1 SUP
M  SLB  1   1   1
M  SAL   1  2  52  53
M  SBL   1  1  55
M  SMT   1 OMe
M  SBV   1 55   -8.6915    7.1303
M  STY  1   2 SUP
M  SLB  1   2   2
M  SAL   2  2  54  55
M  SBL   2  1  57
M  SMT   2 OMe
M  SBV   2 57   -8.6910    7.1303
M  STY  1   3 SUP
M  SLB  1   3   3
M  SAL   3  1  56
M  SBL   3  1  59
M  SMT   3 Me
M  SBV   3 59   -9.0480    6.5115
M  STY  1   4 SUP
M  SLB  1   4   4
M  SAL   4  2  57  58
M  SBL   4  1  60
M  SMT   4 CHO
M  SBV   4 60   -9.4054    7.9551
M  STY  1   5 SUP
M  SLB  1   5   5
M  SAL   5  2  59  60
M  SBL   5  1  62
M  SMT   5 OMe
M  SBV   5 62   -8.4845    7.1864
M  END
$$$$
