# Supplementary material for: Antimetastatic Effect of Halichondramide, a Trisoxazole Macrolide from the Marine Sponge Chondrosia corticata, on Human Prostate Cancer Cells via Modulation of Epithelial-to-Mesenchymal Transition
Source: MDPI journal article supplement (doi:10.3390/md11072472), 2013-07-15
Supplement: s2 [file s2]

marinedrugs-11-02472-s001.mol
  ChemDraw01201408382D

 60 63  0  0  0  0  0  0  0  0999 V2000
   -7.5461    2.2687    0.0000 N   0  0  0  0  0  0  0  0  0  0  0  0
   -6.8317    2.6812    0.0000 C   0  0  0  0  0  0  0  0  0  0  0  0
   -6.1172    2.2687    0.0000 C   0  0  0  0  0  0  0  0  0  0  0  0
   -5.4027    2.6812    0.0000 C   0  0  0  0  0  0  0  0  0  0  0  0
   -4.6882    2.2687    0.0000 C   0  0  0  0  0  0  0  0  0  0  0  0
   -3.9738    2.6812    0.0000 C   0  0  0  0  0  0  0  0  0  0  0  0
   -3.2593    2.2687    0.0000 C   0  0  0  0  0  0  0  0  0  0  0  0
   -2.5448    2.6812    0.0000 C   0  0  0  0  0  0  0  0  0  0  0  0
   -1.8304    2.2687    0.0000 C   0  0  0  0  0  0  0  0  0  0  0  0
   -1.1159    2.6812    0.0000 C   0  0  0  0  0  0  0  0  0  0  0  0
   -0.4014    2.2687    0.0000 C   0  0  0  0  0  0  0  0  0  0  0  0
    0.3131    2.6812    0.0000 C   0  0  0  0  0  0  0  0  0  0  0  0
    1.0275    2.2687    0.0000 C   0  0  0  0  0  0  0  0  0  0  0  0
    1.7420    2.6812    0.0000 C   0  0  0  0  0  0  0  0  0  0  0  0
    2.4565    2.2687    0.0000 C   0  0  0  0  0  0  0  0  0  0  0  0
    3.1709    2.6812    0.0000 C   0  0  0  0  0  0  0  0  0  0  0  0
    3.8854    2.2687    0.0000 C   0  0  0  0  0  0  0  0  0  0  0  0
    4.5999    2.6812    0.0000 C   0  0  0  0  0  0  0  0  0  0  0  0
   -3.9738    3.5062    0.0000 C   0  0  0  0  0  0  0  0  0  0  0  0
   -3.2593    1.4437    0.0000 O   0  0  0  0  0  0  0  0  0  0  0  0
   -1.1159    3.5062    0.0000 C   0  0  0  0  0  0  0  0  0  0  0  0
    1.0275    1.4437    0.0000 O   0  0  0  0  0  0  0  0  0  0  0  0
    1.7420    3.5062    0.0000 C   0  0  0  0  0  0  0  0  0  0  0  0
    5.3143    2.2687    0.0000 C   0  0  0  0  0  0  0  0  0  0  0  0
    5.7268    2.9832    0.0000 O   0  0  0  0  0  0  0  0  0  0  0  0
    6.5237    2.7697    0.0000 C   0  0  0  0  0  0  0  0  0  0  0  0
    5.8977    1.6854    0.0000 N   0  0  0  0  0  0  0  0  0  0  0  0
    6.5237    1.9447    0.0000 C   0  0  0  0  0  0  0  0  0  0  0  0
    7.1071    1.3613    0.0000 C   0  0  0  0  0  0  0  0  0  0  0  0
    6.5237    0.7780    0.0000 N   0  0  0  0  0  0  0  0  0  0  0  0
    7.9040    1.1478    0.0000 O   0  0  0  0  0  0  0  0  0  0  0  0
    6.9362    0.0635    0.0000 C   0  0  0  0  0  0  0  0  0  0  0  0
    7.9040    0.3228    0.0000 C   0  0  0  0  0  0  0  0  0  0  0  0
    6.7227   -0.7334    0.0000 C   0  0  0  0  0  0  0  0  0  0  0  0
    5.9525   -1.0290    0.0000 N   0  0  0  0  0  0  0  0  0  0  0  0
    5.9957   -1.8529    0.0000 C   0  0  0  0  0  0  0  0  0  0  0  0
    6.7926   -2.0664    0.0000 C   0  0  0  0  0  0  0  0  0  0  0  0
    7.2419   -1.3745    0.0000 O   0  0  0  0  0  0  0  0  0  0  0  0
    1.7420    1.0313    0.0000 C   0  0  0  0  0  0  0  0  0  0  0  0
    1.7420    0.2062    0.0000 C   0  0  0  0  0  0  0  0  0  0  0  0
    2.4565   -0.2062    0.0000 C   0  0  0  0  0  0  0  0  0  0  0  0
    2.4565   -1.0313    0.0000 C   0  0  0  0  0  0  0  0  0  0  0  0
    3.1709   -1.4437    0.0000 C   0  0  0  0  0  0  0  0  0  0  0  0
    3.1709   -2.2687    0.0000 C   0  0  0  0  0  0  0  0  0  0  0  0
    3.8854   -2.6812    0.0000 C   0  0  0  0  0  0  0  0  0  0  0  0
    4.5999   -2.2687    0.0000 C   0  0  0  0  0  0  0  0  0  0  0  0
    1.0275    0.6188    0.0000 O   0  0  0  0  0  0  0  0  0  0  0  0
    1.7420   -0.6188    0.0000 O   0  0  0  0  0  0  0  0  0  0  0  0
    5.3143   -2.6812    0.0000 C   0  0  0  0  0  0  0  0  0  0  0  0
    4.5999   -3.0938    0.0000 C   0  0  0  0  0  0  0  0  0  0  0  0
    3.8854   -3.5062    0.0000 O   0  0  0  0  0  0  0  0  0  0  0  0
   -4.3322    2.0625    0.0000 O   0  0  0  0  0  0  0  0  0  0  0  0
   -3.6185    1.6505    0.0000 C   0  0  0  0  0  0  0  0  0  0  0  0
   -0.0448    2.0625    0.0000 O   0  0  0  0  0  0  0  0  0  0  0  0
    0.6689    1.6505    0.0000 C   0  0  0  0  0  0  0  0  0  0  0  0
   -7.5465    1.4437    0.0000 C   0  0  0  0  0  0  0  0  0  0  0  0
   -7.9040    2.8873    0.0000 C   0  0  0  0  0  0  0  0  0  0  0  0
   -7.1903    2.4752    0.0000 O   0  0  0  0  0  0  0  0  0  0  0  0
    5.8774   -2.8314    0.0000 O   0  0  0  0  0  0  0  0  0  0  0  0
    6.5911   -3.2435    0.0000 C   0  0  0  0  0  0  0  0  0  0  0  0
  1  2  1  0      
  2  3  2  0      
  3  4  1  0      
  4  5  1  0      
  5  6  1  0      
  6  7  1  0      
  7  8  1  0      
  8  9  1  0      
  9 10  1  0      
 10 11  1  0      
 11 12  1  0      
 12 13  1  0      
 13 14  1  0      
 14 15  1  0      
 15 16  1  0      
 16 17  1  0      
 17 18  2  0      
  6 19  1  0      
  7 20  2  0      
 10 21  1  0      
 13 22  1  0      
 14 23  1  0      
 18 24  1  0      
 24 25  1  0      
 25 26  1  0      
 24 27  2  0      
 26 28  2  0      
 27 28  1  0      
 28 29  1  0      
 29 30  2  0      
 29 31  1  0      
 30 32  1  0      
 31 33  1  0      
 32 33  2  0      
 32 34  1  0      
 34 35  2  0      
 35 36  1  0      
 36 37  2  0      
 37 38  1  0      
 38 34  1  0      
 22 39  1  0      
 39 40  1  0      
 40 41  1  0      
 41 42  1  0      
 42 43  1  0      
 43 44  2  0      
 44 45  1  0      
 45 46  1  0      
 39 47  2  0      
 41 48  1  0      
 46 49  1  0      
 49 36  1  0      
 46 50  1  0      
 45 51  2  0      
  5 52  1  0      
 52 53  1  0      
 11 54  1  0      
 54 55  1  0      
  1 56  1  0      
  1 57  1  0      
 57 58  2  0      
 49 59  1  0      
 59 60  1  0      
M  STY  1   1 SUP
M  SLB  1   1   1
M  SAL   1  2  52  53
M  SBL   1  1  55
M  SMT   1 OMe
M  SBV   1 55   -8.6915    7.1303
M  STY  1   2 SUP
M  SLB  1   2   2
M  SAL   2  2  54  55
M  SBL   2  1  57
M  SMT   2 OMe
M  SBV   2 57   -8.6910    7.1303
M  STY  1   3 SUP
M  SLB  1   3   3
M  SAL   3  1  56
M  SBL   3  1  59
M  SMT   3 Me
M  SBV   3 59   -9.0480    6.5115
M  STY  1   4 SUP
M  SLB  1   4   4
M  SAL   4  2  57  58
M  SBL   4  1  60
M  SMT   4 CHO
M  SBV   4 60   -9.4054    7.9551
M  STY  1   5 SUP
M  SLB  1   5   5
M  SAL   5  2  59  60
M  SBL   5  1  62
M  SMT   5 OMe
M  SBV   5 62   -8.4845    7.1864
M  END
